# Supplementary material for: Assessing Basal and Acute Autophagic Responses in the Adult Drosophila Nervous System: The Impact of Gender, Genetics and Diet on Endogenous Pathway Profiles
Source: PubMed Central journal article supplement (PMC5053599; doi:10.1371/journal.pone.0164239), 2016-10-06
Supplement: pone.0164239.s001.pdf [file pone.0164239.s001.pdf]

**S1 Table. Changing adult *Drosophila* weight profiles**

| <b>A. Females</b>    | <b>N</b> | <b>Average</b> | <b>SEM</b> | <b>% Change</b> |
|----------------------|----------|----------------|------------|-----------------|
| 0h                   | 16*      | 1.170          | 0.015      |                 |
| 4h IF                | 8        | 1.100          | 0.003      | -0.060          |
| 8h IF                | 8        | 1.058          | 0.014      | -0.096          |
| 24h IF               | 8        | 1.030          | 0.005      | -0.120          |
| Re-Feed              | 12       | 1.181          | 0.003      | +0.116          |
| <b>B. Males</b>      | <b>N</b> | <b>Average</b> | <b>SEM</b> | <b>% Change</b> |
| 0h                   | 24*      | 0.787          | 0.003      |                 |
| 4h IF                | 12       | 0.763          | 0.003      | -0.026          |
| 8h IF                | 12       | 0.751          | 0.003      | -0.046          |
| 24h IF               | 12       | 0.699          | 0.008      | -0.111          |
| Re-Feed              | 21       | 0.777          | 0.005      | -0.012          |
| <b>C. Aged Males</b> | <b>N</b> | <b>Average</b> | <b>SEM</b> |                 |
| 1-week               | 12*      | 0.804          | 0.038      |                 |
| 4-week               | 12       | 0.811          | 0.034 (ns) |                 |
| 4-week IF            | 12       | 0.817          | 0.028 (ns) |                 |

\*N values represent weights flies (25) within multiple cohorts. At least 100 individual flies were used for each study.
