# Supplementary material for: Assessing Basal and Acute Autophagic Responses in the Adult Drosophila Nervous System: The Impact of Gender, Genetics and Diet on Endogenous Pathway Profiles
Source: PubMed Central journal article supplement (PMC5053599; doi:10.1371/journal.pone.0164239), 2016-10-06
Supplement: pone.0164239.s002.pdf [file pone.0164239.s002.pdf]

**S2 Table. Longevity profiles**

| <b>Genotype</b>                            | <b>Average (days)</b> | <b>SEM</b> | <b>N</b> | <b>P Value</b> | <b>% Change</b> |
|--------------------------------------------|-----------------------|------------|----------|----------------|-----------------|
| <b><i>w<sup>1118</sup>/+</i> males</b>     | 41                    | 0.6        | 322      |                |                 |
| <b><i>w<sup>1118</sup>/+</i> IF males</b>  | 46                    | 1.1        | 217      | <0.0001*       | ↑ 12.2          |
| <b><i>chico<sup>1</sup>/+</i> males</b>    | 55.8                  | 1.1        | 121      |                |                 |
| <b><i>chico<sup>1</sup>/+</i> IF males</b> | 57                    | 1.1        | 120      | 0.438*         | ↑ 1.1           |
| <b><i>Atg8a<sup>1</sup></i> males</b>      | 36                    | 1.4        | 127      |                |                 |
| <b><i>Atg8a<sup>1</sup></i> IF males</b>   | 44                    | 1.7        | 104      | 0.0003*        | ↑ 22.3          |
| <b><i>Atg8a<sup>2</sup></i> males</b>      | 22.5                  | 1.3        | 83       |                |                 |
| <b><i>Atg8a<sup>2</sup></i> IF males</b>   | 28.6                  | 1.0        | 143      | 0.0002*        | ↑ 27.1          |

\* P values determined between *ad libitum* and IF-treatment gender and genotype fly cohorts.
